# Supplementary material for: Assessment of xenoestrogenic exposure by a biomarker approach: application of the E-Screen bioassay to determine estrogenic response of serum extracts
Source: Springer Nature journal article supplement (doi:10.1186/1476-069x-2-12), 2003-10-15
Supplement: Additional file 1 [file 1476-069x-2-12-s1.doc]

**Appendix: additional file**

# Retention time and estrogenic response of analyzed compounds

| Compound | Cas  number | Rt  (min) | MOEC | | RPP | Purity  % | Supplier |
| --- | --- | --- | --- | --- | --- | --- | --- |
| M | RPE |
| *Endogenous compounds* |  |  |  |  |  |  |  |
| Cholesterol | 57-88-5 | 1.83 | 0.0001-10 | Nonactive | - | 99 | Sigma |
| 5*α*-dihydroprogesterone | 566-65-4 | 4.14 | 10 | 58 ± 3 | 0.01 | 98 | Sigma |
| Progesterone | 57-83-0 | 5.03 | 25 | 16 ± 2 | 0.004 | 99 | Sigma |
| Pregnenolone | 145-13-1 | 6.07 | 10 | 92 ± 6 | 0.01 | 98 | Sigma |
| Androsterone | 53-41-8 | 6.21 | 10 | 97 ± 3 | 0.01 | 98 | Steraloids Inc |
| 5**-dihydrotestosterone | 521-18-6 | 6.63 | 1 | 64 ± 5 | 0.1 | - | Steraloids Inc |
| Androstenedione | 63-05-8 | 6.80 | 10 | 16 ± 2 | 0.01 | 98 | Sigma |
| Dehydroepiandrosterone | 53-43-0 | 6.86 | 1 | 92 ± 2 | 0.1 | 99 | Sigma |
| Testosterone | 58-22-0 | 8.23 | 10 | 34 ± 5 | 0.01 | 99 | Fluka |
| Estrone | 53-16-7 | 9.06 | 0.01 | 84 ± 8 | 10 | 99 | Sigma |
| 17*α*-hydroxyprogesterone | 68-96-2 | 9.23 | 10 | 7 ± 1 | 0.01 | 98 | Sigma |
| 17*α*-hydroxypregnenolone | 387-79-1 | 12.78 | 10 | 30 ± 1 | 0.01 | 99 | Sigma |
| 4-hydroxyestrone | 3131-23-5 | 14.58+  25.08 | 1 | 64 ± 1 | 0.1 | 98.6 | Sigma |
| 17*β*-estradiol | 50-28-2 | 14.83 | 0.001 | 100 ± 7 | 100 | 99.4 | Sigma |
| 16*α*-hydroxyestrone | 566-76-7 | 22.86 | 0.01 | 77 ± 2 | 10 | 95 | Sigma |
| Estriol | 50-27-1 | 24.01 | 0.01 | 103 ± 3 | 10 | 99 | Sigma |
| *Contraceptives* |  |  |  |  |  |  |  |
| Testosterone decanoate | 5721-91-5 | 2.00+  2.86 | 1 | 102 ± 12 | 0.1 | 98 | N.V. Organon |
| Mestranol | 72-33-3 | 4.63 | 0.01 | 110 ± 3 | 10 | - | ICN Biochemicals |
| Cyproterone acetate | 427-51-0 | 4.63 | 1 | 19 ± 5 | 0.1 | 98 | Sigma |
| Estradiol-17-valerate | 979-32-8 | 4.92 | 0.01 | 128 ± 6 | 10 | 98 | Schering AG |
| Norethindrone acetate | 51-98-9 | 6.50 | 1 | 140 ± 29 | 0.1 | 99.9 | Sigma |
| Medroxyprogesterone acetate | 71-58-9 | 6.88 | 0.0001 -1 | Nonactive | - | 97 | Sigma |
| Equilin | 474-86-2 | 9.13 | Nd | - | - | - | ICN Biochemicals |
| Norgestrel | 797-63-7 | 9.81 | Nd | - | - | 99 | Sigma |
| Norethindrone | 68-22-4 | 10.52 | 1 | 95 ± 15 | 0.1 | 99 | Sigma |
| Gestodene | 60282-87-3 | 11.88 | 1 | 103 ± 9 | 0.1 | - | Schering AG |
| 17**-ethinylestradiol | 57-63-6 | 19.57 | 0.1 | 100 ± 5 | 1 | 99.1 | Sigma |
| Dienestrol | 84-17-3 | 19.69 | 0.01 | 103 ± 9 | 10 | 98 | Sigma |
| Desogestrel | 54024-22-5 | Nd | 1 | 60 ± 18 | 0.1 | - | N.V. Organon |
| Lynestrenol | 52-76-6 | Nd | 1 | 72 ± 14 | 0.1 | - | N.V. Organon |
| *PCBs and metabolites* |  |  |  |  |  |  |  |
| PCB180 | 35065-29-3 | 1.40 | 0.001 – 50 | Nonactive | - | 97.0 | Dr. Ehrenstorfer |
| PCB153 | 35065-27-1 | 1.48 | 0.001 – 50 | Nonactive | - | 97.5 | Dr. Ehrenstorfer |
| PCB138 | 35065-28-2 | 1.49 | 0.001 – 50 | Nonactive | - | 99.5 | Dr. Ehrenstorfer |
| PCB118 | 31508-11-5 | 1.51 | Nd | - | - | 99.5 | Dr. Ehrenstorfer |
| PCB105 | 32598-14-4 | 1.82 | Nd | - | - | - | Ultra Scientific |
| 4-OH-CB187 | - | 2.67 | 50 | 24 ± 4 | 0.002 | - | Dr. Aa. Bergmana |
| 4-OH-CB146 | - | 2.67 | 0.001 – 50 | Nonactive | - | - | Dr. Aa. Bergmana |
| 4-OH-CB107 | - | 2.70 | 0.001 – 50 | Nonactive | - | - | Dr. Aa. Bergmana |
| *Phthalates* |  |  |  |  |  |  |  |
| Diisodecyl phthalate | 26761-40-0 | 1.62 | 50 | 20.1 ± 5 | 0.002 | 99 | Aldrich |
| Diisononyl phthalate | 28553-12-0 | 1.70 | 0.01 - 100 | Nonactive | - | 99 | Aldrich |
| Diisooctyl phthalate | 27554-26-3 | 1.70 | 0.01 - 100 | Nonactive | - | 99 | Aldrich |
| Di-(2-ethylhexyl) phthalate | 117-81-7 | 2.14 | 10 | 23.9 ± 9 | 0.01 | 99 | Aldrich |
| Diisobutyl phthalate | 84-69-5 | 2.49 | Nd | - | - | 98 | TCI |
| Dibutyl phthalate | 84-74-2 | 2.90 | 5 | 41.1 ± 11 | 0.02 | 98 | Riedel-de Häen |
| Benzylbutyl phthalate | 85-68-7 | 3.12 | 10 | 48.6 ± 3 | 0.01 | 97 | Riedel-de Häen |
| Diallyl phthalate | 131-17-9 | 3.57 | Nd | - | - | 97 | Aldrich |
| Diethyl phthalate | 84-66-2 | 4.30 | 0.01 - 100 | Nonactive | - | 99 | Aldrich |
| Dimethyl phthalate | 131-11-3 | 4.96 | 0.01 - 100 | Nonactive | - | 99 | Aldrich |
| Di-(2-methoxyethyl) phthalate | 117-82-8 | 7.01 | 0.01 - 100 | Nonactive | - | - | TCI |
| *Miscellaneous* |  |  |  |  |  |  |  |
| Hexachlorobenzene | 118-74-1 | 1.34 | 0.001 – 50 | Nonactive | - | 99.7 | Dr. Ehrenstorfer |
| 4-n-nonylphenol | 104-40-5 | 3.43 | 10 | 52.2 ± 7 | 0.01 | 99.9 | Dr. Ehrenstorfer |
| 4-n-octylphenol | 1806-26-4 | 3.51 | 10 | 71.6 ± 4 | 0.01 | 99.4 | Dr. Ehrenstorfer |
| **-hexachlorocyclohexane | 319-85-7 | 4.13 | 2.5 | 61 ± 2 | 0.04 | 99.3 | NSI |
| 4-nonylphenol ethoxylate | 26027-38-3 | 11.21 – 26.10b | 0.01 - 100 | Nonactive | - | - | LGC Promochem |
| Diethyl stilbestrol | 56-53-1 | 14.20 | 0.001 | 97.0 ± 2 | 100 | 99 | Sigma |
| Tamoxifen | 10540-29-1 | 15.80 | 0.1 | 13.4 ± 3 | 1 | 96 | Aldrich |
| Bisphenol-A | 80-05-7 | 15.89 | 1 | 70.1 ± 8 | 0.1 | 99 | Aldrich |
| Bisphenol-A dimethacrylate | 3253-39-2 | Nd | 1 | 95.5 ± 12 | 0.1 | 99.7 | Aldrich |
| ICI 182.780 | 129453-61-8 | Nd | 0.0001 - 1 | Nonactive | - | 99.3 | Astra Zeneca |
| Ethanol | 64-17-5 | Nd | - | Nonactive | - | 96 | Fluka |
| Dimethyl sulfoxide | 67-68-5 | Nd | - | Nonactive | - | 99.7 | Sigma |
| Insecticides |  |  |  |  |  |  |  |
| *p,p'*-DDE | 72-55-9 | 1.43 | 12.5 | 92 ± 2 | 0.008 | 99.7 | Sigma |
| *o,p'*-DDT | 789-02-6 | 1.53 | 6.25 | 96 ± 7 | 0.016 | 99.8 | Sigma |
| Dieldrin | 60-57-1 | 1.75 | 25 | 44 ± 9 | 0.004 | - | Dr. Ehrenstorfer |
| Endosulfanc | 115-29-7 | 1.75-6.33d | 12.5 | 97 ± 11 | 0.008 | 99,3 | Dr. Ehrenstorfer |
| Chlorpyriphos | 2921-88-2 | 2.01 | 50 | 26 ± 14 | 0.002 | 98,7 | Dr. Ehrenstorfer |
| Methoxychlor | 72-43-5 | 2.29 + 2.88 | 12.5 | 57 ± 8 | 0.008 | 98.4 | Dr. Ehrenstorfer |
| Fenpropathrin | 64257-84-7 | 2.74 | 0.01 - 100 | Nonactive | - | 99,3 | Dr. Ehrenstorfer |
| Deltamethrin | 52918-63-5 | 3.43-  10.03e | 25 | 19 ± 6 | 0.004 | 98,5 | Dr. Ehrenstorfer |
| Dichlorvos | 62-73-7 | 4.10 | 0.01 - 100 | Nonactive | - | 99 | Dr. Ehrenstorfer |
| Pirimicarb | 23103-98-2 | 5.20 | 0.01 - 100 | Nonactive | - | 99,7 | Dr. Ehrenstorfer |
| Methiocarb | 2032-65-7 | 6.79 | 50 | 32 ± 9 | 0.002 | 99,4 | Dr. Ehrenstorfer |
| Dimethoate | 60-51-5 | 16.33 | 0.01 - 100 | Nonactive | - | 99,5 | Dr. Ehrenstorfer |
| Methomyl | 16752-77-5 | 23.33 | 0.01 - 100 | Nonactive | - | 99,7 | Dr. Ehrenstorfer |
| Methiocarb sulfoxid | 2635-10-1 | Nd | 0.01 - 100 | Nonactive | - | - | Dr. Ehrenstorfer |
| *Fungicides* |  |  |  |  |  |  |  |
| Tolchlofosmethyl | 57018-04-9 | 2.94 | 50 | 32 ± 4 | 0.002 | 98,8 | Dr. Ehrenstorfer |
| Vinclozolin | 50471-44-8 | 3.39+  5.80 | 0.01 - 100 | Nonactive | - | 98,5 | Dr. Ehrenstorfer |
| Chlorothalonil | 1897-45-6 | 3.58 | 0.01 - 100 | Nonactive | - | 97,5 | Dr. Ehrenstorfer |
| Iprodion | 36734-19-7 | 3.93 | 0.01 - 100 | Nonactive | - | 95 | Dr. Ehrenstorfer |
| Prochloraz | 67747-09-5 | 6.54 | 0.01 -100 | Nonactive | - | 97 | Dr. Ehrenstorfer |
| Fenarimol | 60168-88-9 | 6.70 | 25 | 51 ± 2 | 0.004 | 99,2 | Dr. Ehrenstorfer |
| Fosetyl-aluminium | 39148-24-8 | Nd | 0.01 - 100 | Nonactive | - | 85,5 | Dr. Ehrenstorfer |
| Propamocarb | 24579-73-5 | Nd | 0.01 - 100 | Nonactive | - | 96,6 | Dr. Ehrenstorfer |
| *Herbicides* |  |  |  |  |  |  |  |
| Tribenuronmethyl | 101200-48-2 | 6.94 | 50 | 7 ± 1 | 0.002 | 91 | Dr. Ehrenstorfer |
| *Growth regulators* |  |  |  |  |  |  |  |
| Paclobutrazol | 76738-62-0 | 6.54 | 0.01 - 100 | Nonactive | - | 99,6 | Dr. Ehrenstorfer |
| Daminozide | 1596-84-5 | 9.26 | 0.01 - 100 | Nonactive | - | 96 | Dr. Ehrenstorfer |
| Chlormequatchloride | 999-81-5 | Nd | 0.01 - 100 | Nonactive | - | 97 | Dr. Ehrenstorfer |
| Ethephon | 16672-87-0 | Nd | 0.01 - 100 | Nonactive | - | 95 | Dr. Ehrenstorfer |

*Abbreviations:* nd, not determined; MOEC, maximum observed effect concentration; RPE, relative proliferative effect; RPP

, relative proliferative potency; Rt, retention time.

*Notes:* akindly provided by Dr. Aa. Bergman (Stockholm, Sweden); bRt: 11.21+11.83+14.82+17.29+21.38+26.10;c75 % - / 25 % -isomer; dRt: 1.75+3.45+4.89+5.45+6.34; eRt: 3.43+3.71+10.03.

*Suppliers:* Aldrich (Steinheim, Germany); Astra Zeneca (Cheshire, UK); Dr. Ehrenstorfer GmbH (Augsburg, Germany); Fluka (Buchs, Switzerland); ICN Biochemicals Inc. (Costa Mesa, CA, US); N.V. Organon (Skovlunde, Denmark); NSI Solutions Inc (Research Triangle Park, NC, US); LGC Promochem (Teddington, UK); Riedel-de Häen (Seelze, Germany); Schering AG (Berlin, Germany); Sigma (St.Louis, MO, US); Steraloids Inc (Newport, RI, US); TCI (Tokyo, Japan); Ultra Scientific (North Kingstown, RI, US).
